# Supplementary material for: Phase I study of high-dose ascorbic acid with mFOLFOX6 or FOLFIRI in patients with metastatic colorectal cancer or gastric cancer
Source: Springer Nature journal article supplement (doi:10.1186/s12885-019-5696-z), 2019-05-16

# Supplementary Figure 1

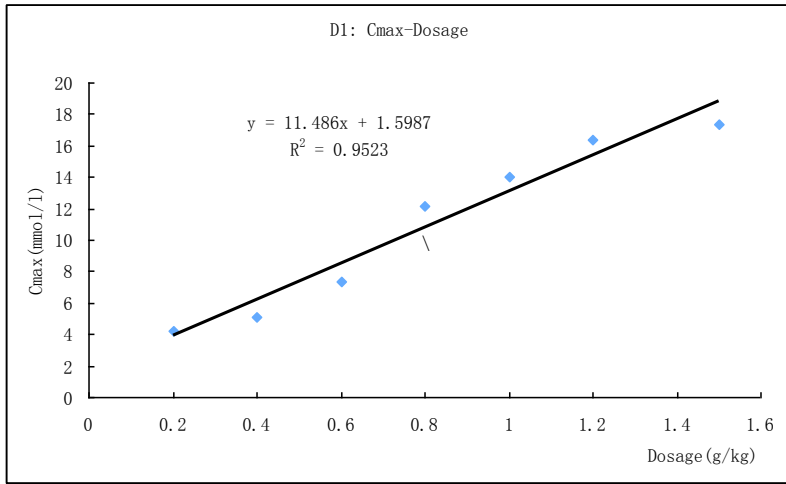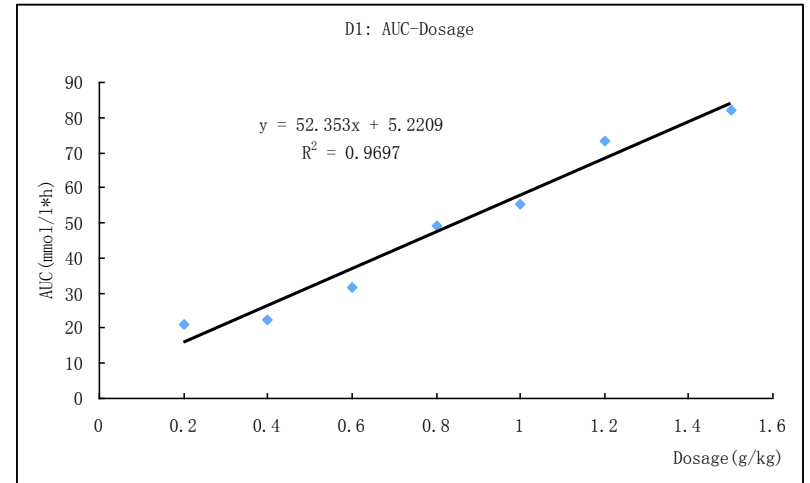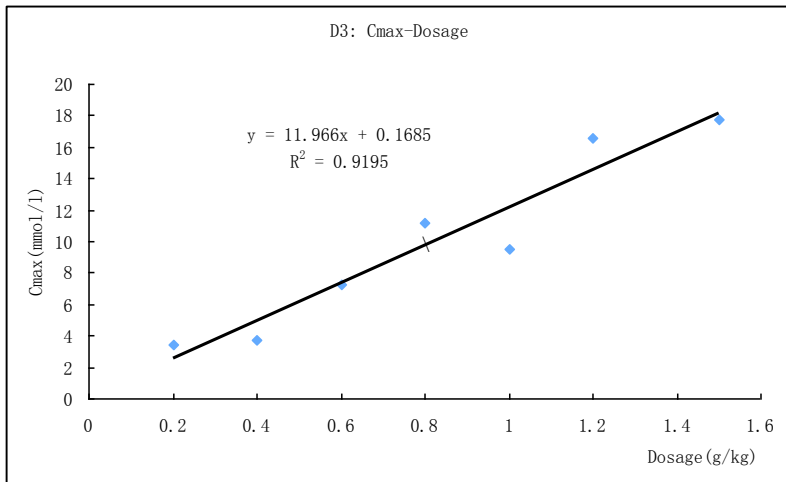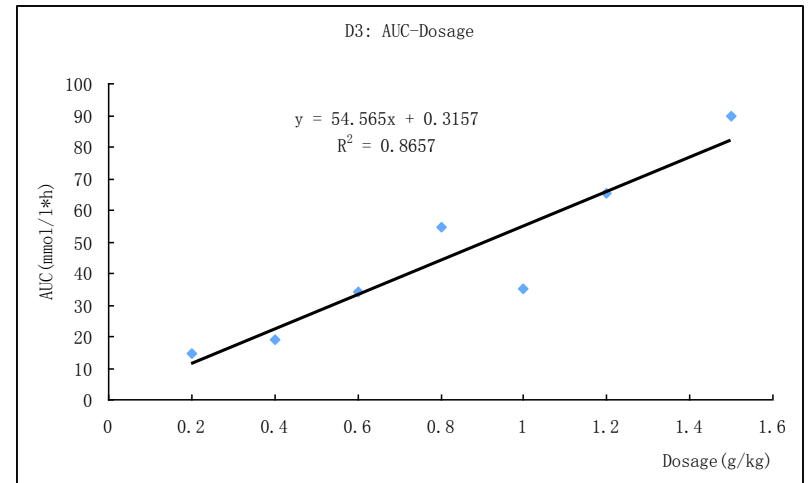

Supplement: 12885_2019_5696_MOESM1_ESM.pdf [file 12885_2019_5696_MOESM1_ESM.pdf]
