# Supplementary material for: Phase I study of high-dose ascorbic acid with mFOLFOX6 or FOLFIRI in patients with metastatic colorectal cancer or gastric cancer
Source: PubMed Central journal article supplement (PMC6524297; doi:10.1186/s12885-019-5696-z), 2019-05-16

# Supplementary Figure 2

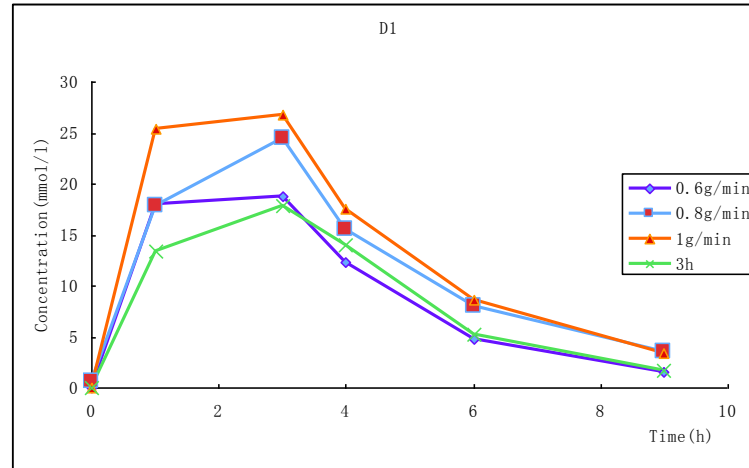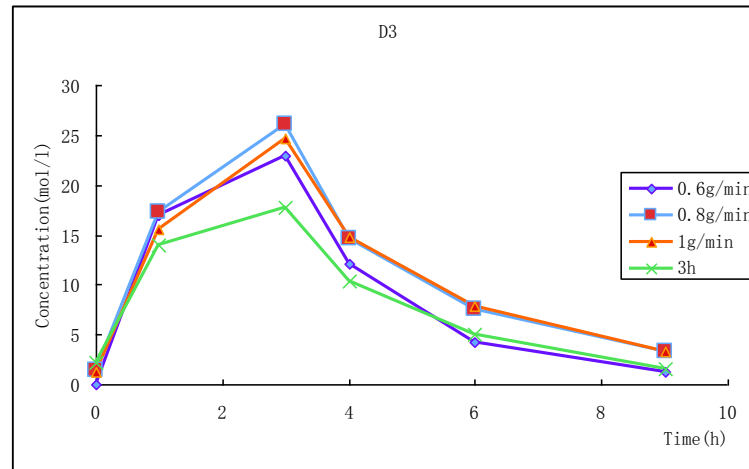

Supplement: 12885_2019_5696_MOESM2_ESM.pdf [file 12885_2019_5696_MOESM2_ESM.pdf]
